# Supplementary material for: Close-packed assemblies of discrete tiny silver nanoparticles on triangular gold nanoplates as a high performance SERS probe
Source: Royal Society of Chemistry journal article supplement (doi:10.1039/c5ra18195j), 2015-01-01
Supplement: c5ra18195j1.pdf [file c5ra18195j1.pdf]

## Supporting Information

### Close-packed assemblies of discrete tiny silver nanoparticles on triangular gold nanoplates as high performance SERS probe

Youju Huang,<sup>\*a, †</sup> Palanisamy Kannan,<sup>b, †</sup> Lei Zhang,<sup>a</sup> Yun Rong,<sup>a</sup> Liwei Dai,<sup>a</sup> Rongqin Huang<sup>c</sup> and Tao Chen<sup>\*a</sup>

<sup>a</sup> Division of Polymer and Composite Materials, Ningbo Institute of Material Technology and Engineering, Chinese Academy of Science, 1219 Zhongguan West Road, Ningbo 315201, China.

E-mail: [yjhuang@nimte.ac.cn](mailto:yjhuang@nimte.ac.cn); E-mail: [tao.chen@nimte.ac.cn](mailto:tao.chen@nimte.ac.cn);

<sup>b</sup> Singapore Centre on Environmental Life Science Engineering (SCELSE), Nanyang Technological University, Singapore.

<sup>c</sup> Key Laboratory of Smart Drug Delivery, Ministry of Education (Fudan University), Shanghai 201203, China

<sup>†</sup> These authors contribute equally to this work.

**Table: S1 Comparison of SERS analysis of R6G on different nanomaterials.**

| Ref. No | Nanomaterials based SERS substrate for R6G                                                    | Enhancement Factor (EF) |
|---------|-----------------------------------------------------------------------------------------------|-------------------------|
| 1       | SERS of R6G on Pt nanoaggregates                                                              | $5 \times 10^4$         |
| 2       | SERS of R6G on metallic nanogap array fabricated by etching the assembled polystyrene spheres | $2 \times 10^6$         |
| 3       | SERS R6G on Fe <sub>3</sub> O <sub>4</sub> and gold nanoparticles                             | $6.74 \times 10^6$      |
| 4       | SERS of R6G on nanostructured substrate with Ag nanoparticles                                 | $5 \times 10^5$         |
| 5       | SERS of R6G on Au nanoparticles arrays                                                        | $6.5 \times 10^6$       |
| 6       | SERS of R6G on square-centimeter-scale 2D-arrays of Au@Ag core-shell nanoparticles            | $5.9 \times 10^6$       |
| 7       | SERS of R6G on Au nanowire bundles                                                            | $8.6 \times 10^6$       |
| 8       | SERS of R6G on multiple depositions of Ag nanoparticles                                       | $1.5 \times 10^7$       |
| 9       | SERS of R6G on Ag nanoparticles on Au nanoplates                                              | $4.3 \times 10^7$       |

#### References

1. N. H. Kim, and K. Kim, *J. Raman Spectrosc.* **2005**, *36*, 623–628.

2. L. Xia, Z. Yang, S. Yin, W. Guo, S. Li, W. Xie, D. Huang, Q. Deng, H. Shi, H. Cui, and C. Du, *Opt. Exp.* **2013**, *21*, 11349-11355.
3. F. Hu, H. Lin, Z. Zhang, F. Liao, M. Shao, Y. Lifshitz, and S-T. Lee, *Sci. Rep.* **2014**, *4*, 7204.
4. Y. Han, Z. Liang, H. Sun, H. Xiao, H-L. Tsai, *Appl Phys A* **2011**, *102*, 415–419.
5. Y. Zheng, W. Wang, Q. Fu, M. Wu, K. Shayan, K. M. Wong, S. Singh, A. Schober, P. Schaaf, and Y. Lei, *ChemPlusChem* **2014**, *79*, 1622-1630.
6. F. Pincella, Y. Song, T. Ochiai, K. Isozaki, K. Sakamoto, K. Miki, *Chem. Phys. Lett.* **2014**, *605–606*, 115–120.
7. Y. Huang, A. R. Ferhan, S-J. Cho, H. Lee, and D-H. Kim, *ACS Appl. Mater. Inter.* **2015**, *7*, 17582–17586.
8. W-L. Zhai, D-W. Li, L-L. Qu, J. S. Fossey, and Y-T. Long, *Nanoscale*, **2012**, *4*, 137–142.
9. Present work.
